# Supplementary material
Source: MDPI journal article supplement (https://www.mdpi.com/1424-2818/13/9/443)
Supplement: s1 [file s1]

## Supplementary materials

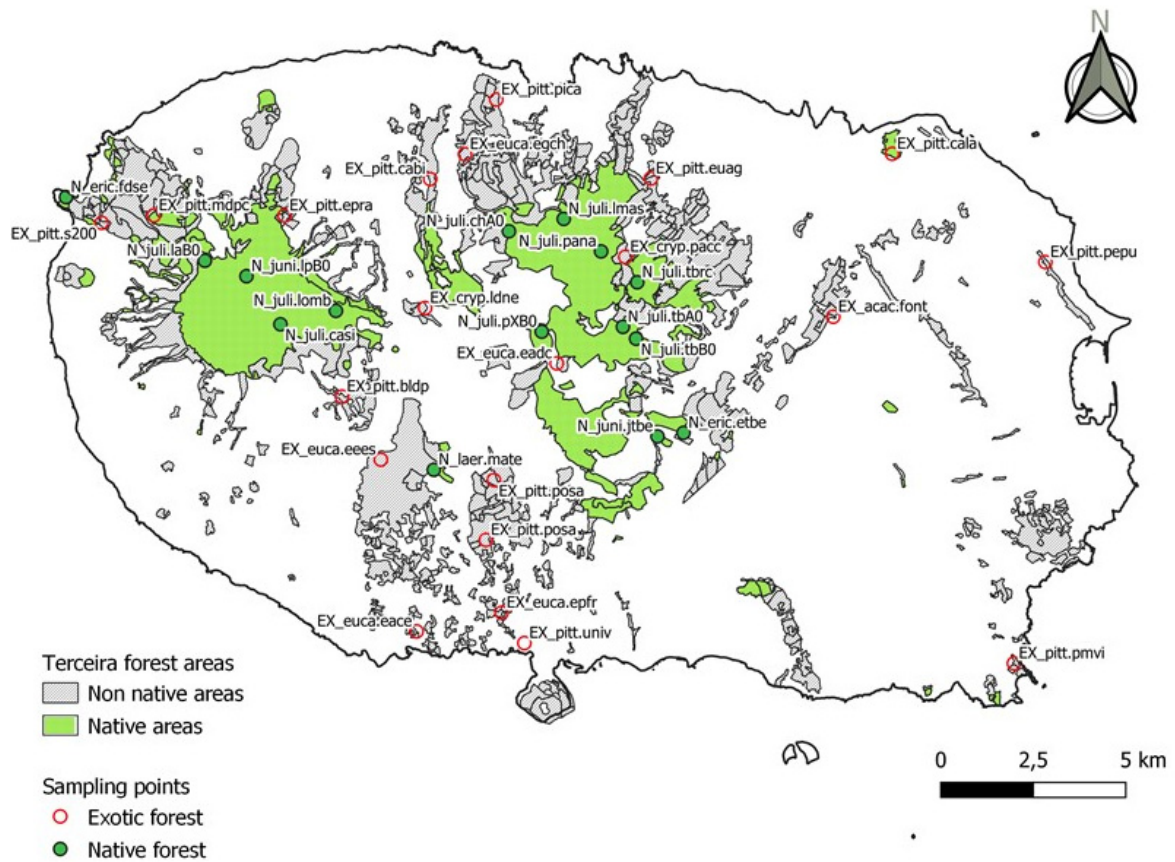

**Figure S1.**

### Map of study area

Sites Ex\_pitt.Cala and Ex\_pitt.mdpc were originally native forest fragments but are now invaded by *Pittosporum*

**Table S1**

Sampling sites in native and exotic forests of Terceira island. The dominant trees species is indicated.

| Type of forest | Dominant trees                                        | Name of sampling sites         | Abbreviation name of sampling sites |
|----------------|-------------------------------------------------------|--------------------------------|-------------------------------------|
| Native forest  | <i>-Erica azorica</i>                                 | Farol da Serreta               | N_eric.fdse                         |
|                | Hochst. ex Seub.<br>(Family:<br>Ericaceae)            | Erical Trilho Bestas           | N_eric.etbe                         |
|                | <i>-Juniperus</i>                                     | Caldeira St. Barbara – Silvia  | N_juli.casi                         |
|                | <i>brevifolia</i>                                     | Chambre A                      | N_juli.chA0                         |
|                | (Hochst. ex                                           | Lagoinha B                     | N_juli.laB0                         |
|                | Seub.) Antoine                                        | Labaçal -Morro Assombrado      | N_juli.lmas                         |
|                | subsp. <i>brevifolia</i>                              | Lomba                          | N_juli.lomb                         |
|                | (Family:                                              | Pico Alto Nascente             | N_juli.pana                         |
|                | Cupressaceae)                                         | Pico X B                       | N_juli.pXB0                         |
|                | <i>Laurus azorica</i>                                 | Terra Brava -A                 | N_juli.tbA0                         |
|                | (Seub.) Franco                                        | Terra Brava -B                 | N_juli.tbB0                         |
|                | (Family:                                              | Terra-Brava Rocha Cedrorum     | N_juli.tbrc                         |
|                | Lauraceae)                                            |                                |                                     |
|                | <i>Ilex azorica</i> Gand.<br>(Family:<br>Aquifoliace) |                                |                                     |
| Exotic forest  | <i>-Juniperus</i>                                     | Juniperal Trilho Bestas        | N_juni.jtbe                         |
|                | <i>brevifolia</i>                                     | Lagoa Pinheiro B               | N_juni.lpB0                         |
|                | (Hochst. ex                                           |                                |                                     |
|                | Seub.) Antoine                                        |                                |                                     |
|                | subsp. <i>brevifolia</i>                              |                                |                                     |
|                | (Family:                                              |                                |                                     |
|                | Cupressaceae)                                         |                                |                                     |
|                | <i>-Erica azorica</i>                                 | Matela 1                       | N_laer.mate                         |
|                | Hochst. ex Seub.<br>(Family:<br>Ericaceae)            |                                |                                     |
|                | <i>Laurus azorica</i>                                 |                                |                                     |
|                | (Seub.) Franco                                        |                                |                                     |
|                | (Family:<br>Lauraceae)                                |                                |                                     |
|                | <i>-Acacia</i>                                        | Fontinhas 1                    | EX_acac.font                        |
|                | <i>melanoxylon</i><br>R.Br. (Family:<br>Fabaceae)     |                                |                                     |
| Exotic forest  | <i>-Cryptomeria</i>                                   | Lagoa do Negro                 | EX_cryp.ldne                        |
|                | <i>japonica</i> D.Don                                 | Pico Alto                      | EX_cryp.pacc                        |
|                | (Family:<br>Cupressaceae)                             |                                |                                     |
|                | <i>-Eucalyptus</i>                                    | Canada Entre Picos – S. Mateus | EX_euca.eace                        |
|                | <i>globulus</i> Labill.                               | Eucaliptal Algar do Carvão     | EX_euca.eadc                        |
|                | (Family:                                              | Escampadoro                    | EX_euca.eees                        |
|                | Myrtaceae)                                            | Gruta Chocolate                | EX_euca.egch                        |
|                |                                                       | Ermida Penha de França         | EX_euca.epfr                        |

|                                                                               |                                    |              |
|-------------------------------------------------------------------------------|------------------------------------|--------------|
| - <i>Pittosporum</i><br><i>undulatum</i> Vent.<br>(Family:<br>Pittosporaceae) | Betulas_Lagoa das Patas            | EX_pitt.bldp |
|                                                                               | Caparica - Biscoitos               | EX_pitt.cabi |
|                                                                               | Caldeira Lajes                     | EX_pitt.cala |
|                                                                               | Pico Rachado_Altares               | EX_pitt.epra |
|                                                                               | Agualva                            | EX_pitt.euag |
|                                                                               | Mirador do Pico Carneiro           | EX_pitt.mdpc |
|                                                                               | Mata Estado - Veredas              | EX_pitt.meve |
|                                                                               | Pizza-UT – Praia da Vitória        | EX_pitt.pepu |
|                                                                               | Carpintaria dos Biscoitos          | EX_pitt.pica |
|                                                                               | Maria Vieira – Porto Judeu         | EX_pitt.pmvi |
|                                                                               | Posto Santo                        | EX_pitt.posa |
|                                                                               | Serreta 200m                       | EX_pitt.s200 |
|                                                                               | Universidade Campus - Pico da Urze | EX_pitt.univ |

---

Table S2

Abundance differences (mean number) of endemic species from four taxonomic groups in Azorean native and exotic forests. The differences between habitats were assessed using Wilcoxon test. Wilcoxon test estimates (W) and p-values are indicated with significant differences in bold.

|                                                    | Native forest | Exotic forest | W            | P-value          |
|----------------------------------------------------|---------------|---------------|--------------|------------------|
| <b>Araneae</b>                                     |               |               |              |                  |
| <i>Acorigone acoreensis</i> (Wunderlich, 1992)     | <b>5.12</b>   | <b>2.00</b>   | <b>55.00</b> | <b>0.05</b>      |
| <i>Canariphantes acoreensis</i> (Wunderlich, 1992) |               | 1.00          |              |                  |
| <i>Emblyna acoreensis</i> Wunderlich, 1992         | 1.00          | 2.00          | 106.00       | 0.49             |
| <i>Gibbaranea occidentalis</i> Wunderlich, 1989    | 5.90          | 6.20          | 70.50        | 0.22             |
| <i>Lasaeola oceanica</i> Simon, 1883               | 1.00          | 1.00          | 92.00        | 0.67             |
| <i>Minicia floresensis</i> Wunderlich, 1992        | 1.00          |               |              |                  |
| <i>Neon acoreensis</i> Wunderlich, 2008            | 1.00          | 1.00          | 92.00        | 0.67             |
| <i>Pisaura acoreensis</i> Wunderlich, 1992         | 1.90          | 12.00         | 77.5         | 0.33             |
| <i>Porrhomma borgesii</i> Wunderlich, 2008         | 1.00          |               |              |                  |
| <i>Rugathodes acoreensis</i> Wunderlich, 1992      | <b>12.89</b>  | <b>7.25</b>   | <b>41.00</b> | <b>0.01</b>      |
| <i>Sancus acoreensis</i> (Wunderlich, 1992)        | 2.43          | 1.67          | 77.50        | 0.28             |
| <i>Savigniorhipis acoreensis</i> Wunderlich, 1992  | <b>9.54</b>   | <b>32.6</b>   | <b>56.00</b> | <b>0.05</b>      |
| <i>Walckenaeria grandis</i> (Wunderlich, 1992)     | 4.67          |               |              |                  |
| <b>Coleoptera</b>                                  |               |               |              |                  |
| <i>Notothecta dryochares</i> (Israelson, 1985)     | <b>3.00</b>   | <b>1.00</b>   | <b>43.00</b> | <b>0.01</b>      |
| <i>Athous azoricus</i> Platia & Gudenzi, 2002      |               | 7.00          |              |                  |
| <i>Atlantocis gillerforsi</i> Israelson, 1985      | 2.50          |               |              |                  |
| <i>Calacalles subcarinatus</i> (Israelson, 1984)   | 4.37          | 9.33          | 64.00        | 0.40             |
| <i>Crotchiella brachyptera</i> Israelson, 1985     | 1.00          |               |              |                  |
| <i>Drouetius borgesii borgesii</i> (Machado, 2009) | 2.67          | 4.00          | 62.00        | 0.14             |
| <i>Euconnus azoricus</i> Franz, 1969               |               | 1.00          |              |                  |
| <i>Heteroderes azoricus</i> (Tarnier, 1860)        | 1.00          | 5.00          | 104.00       | 0.11             |
| <i>Hydroporus guernei</i> Régimbart, 1891          | 2.00          |               |              |                  |
| <i>Metophthalmus occidentalis</i> Israelson, 1984  |               | 15.00         |              |                  |
| <i>Phloeosinus gillerforsi</i> Bright, 1987        | 1.00          |               |              |                  |
| <b>Hemiptera</b>                                   |               |               |              |                  |
| <i>Aphrodes hamiltoni</i> Quartau & Borges, 2003   | 1.00          | 4.00          | 134.00       | 0.97             |
| <i>Cixius azoterceirae</i> Remane & Asche, 1979    | <b>91.48</b>  | <b>32.95</b>  | <b>42.00</b> | <b>&lt;0.001</b> |
| <i>Eupteryx azorica</i> Ribaut, 1941               | 5.14          | 8.22          | 149.50       | 0.59             |
| <i>Nysius atlantidum</i> Horváth, 1890             | 2.00          | 1.00          | 140.00       | 0.74             |
| <i>Pinalitus oromii</i> J. Ribes 1992              | <b>5.29</b>   | <b>2.00</b>   | <b>29.00</b> | <b>&lt;0.001</b> |
| <i>Strophingia harteni</i> Hodkinson, 1981         | 36.18         | 15.58         | 99.00        | 0.15             |
| <b>Psocoptera</b>                                  |               |               |              |                  |
| <i>Elipsocus azoricus</i> Meinander, 1975          | 24.57         | 18.85         | 175.00       | 0.05             |
| <i>Elipsocus brincki</i> Badonnel, 1963            | 23.50         | 29.85         | 87.50        | 0.17             |

**Table S3**

Abundance differences (mean number) of native non-endemic species from four taxonomic groups in Azorean native and exotic forests. The differences between habitats were assessed using Wilcoxon test. Wilcoxon test estimates (W) and p-values are indicated with significant differences in bold.

|                                                         | Native forest | Exotic forest | W            | P-value          |
|---------------------------------------------------------|---------------|---------------|--------------|------------------|
| <b>Araneae</b>                                          |               |               |              |                  |
| <i>Lathys dentichelis</i> (Simon, 1883)                 | 4.87          | 1.83          |              |                  |
| <b><i>Macaroeris cata</i> (Blackwall, 1867)</b>         | <b>7.71</b>   | <b>2.33</b>   | <b>43.5</b>  | <b>&lt;0.001</b> |
| <i>Macaroeris diligens</i> (Blackwall, 1867)            |               | 3.4           |              |                  |
| <i>Microlinyphia johnsoni</i> (Blackwall, 1859)         | 2.86          | 31.73         | 178.5        | 0.19             |
| <i>Palliduphantes schmitzi</i> (Kulczynski, 1899)       | 2             | 1             | 147          | 0.78             |
| <b><i>Porrhoclubiona decora</i> (Blackwall, 1859)</b>   | <b>1.5</b>    | <b>11.92</b>  | <b>231</b>   | <b>&lt;0.001</b> |
| <i>Tenuiphantes miguelensis</i> (Wunderlich, 1992)      | 4             | 7.5           | 139.5        | 0.88             |
| <i>Theridion musivivum</i> Schmidt, 1956                | 1             | 1.6           | 171          | 0.14             |
| <i>Xysticus cor</i> Canestrini, 1873                    | 1.33          |               |              |                  |
| <b>Coleoptera</b>                                       |               |               |              |                  |
| <b><i>Aloconota sulcifrons</i> (Stephens, 1832)</b>     | <b>5</b>      | <b>3</b>      | <b>203.5</b> | <b>0.01</b>      |
| <i>Anaspis proteus</i> Wollaston, 1854                  | 6.42          | 15.75         | 166          | 0.37             |
| <i>Aspidapion radiolus</i> (Marshall, 1802)             | 1             | 1.25          | 158.5        | 0.31             |
| <i>Astenus lyonessius</i> (Joy, 1908)                   |               | 1             |              |                  |
| <i>Attalus lusitanicus lusitanicus</i> Erichson, 1840   |               | 2             |              |                  |
| <i>Carpelimus corticinus</i> (Gravenhorst, 1806)        |               | 2             |              |                  |
| <i>Catops coracinus</i> Kellner, 1846                   | 2.43          | 8.38          | 134.5        | 0.84             |
| <i>Dryops algiricus</i> (Lucas, 1846)                   |               | 2             |              |                  |
| <i>Dryops luridus</i> (Erichson, 1847)                  |               | 9             |              |                  |
| <i>Hirticollis quadriguttatus</i> (Rossi, 1792)         |               | 3.6           |              |                  |
| <b><i>Kalcapion semivittatum</i> (Gyllenhal, 1833)</b>  | <b>1</b>      | <b>2.7</b>    | <b>202</b>   | <b>0.01</b>      |
| <i>Microlestes negrita negrita</i> (Wollaston, 1854)    | 1             |               |              |                  |
| <i>Ocypus aethiops</i> (Waltl, 1835)                    |               | 1             |              |                  |
| <i>Oligota pumilio</i> Kiesenwetter, 1858               |               | 1.25          |              |                  |
| <i>Phloeonomus punctipennis</i> Thomson, 1867           |               | 1             |              |                  |
| <i>Proteinus atomarius</i> Erichson, 1840               | 2.5           | 2             | 133.5        | 0.71             |
| <i>Pseudophloeophagus truncorum</i> (Stephens, 1831)    | 3             |               |              |                  |
| <i>Pseudophloeophagus tenax</i> Wollaston, 1854         | 7.21          | 19.18         | 124          | 0.58             |
| <i>Pseudoplectus perplexus</i> (Jacquelin du Val, 1854) | 1             |               |              |                  |
| <i>Psylliodes marcida</i> (Illiger, 1807)               | 1             | 3             | 137.5        | 0.86             |
| <i>Rhopalomesites tardyi</i> (Curtis, 1825)             |               | 4             |              |                  |
| <i>Rhyzobius litura</i> (Fabricius, 1787)               |               | 1             |              |                  |
| <i>Rugilus orbiculatus</i> (Paykull, 1789)              |               | 1             |              |                  |

|                                                              |              |              |              |                  |  |
|--------------------------------------------------------------|--------------|--------------|--------------|------------------|--|
| <i>Sepedophilus lusitanicus</i> Hammond, 1973                |              | 1            |              |                  |  |
| <i>Stenolophus teutonus</i> (Schränk, 1781)                  | 1            | 1            | 127          | 0.37             |  |
| <i>Stethorus pusillus</i> (Herbst, 1797)                     |              | 4            |              |                  |  |
| <i>Stilbus testaceus</i> (Panzer, 1797)                      | 1            | 3            | 166.5        | 0.17             |  |
| <b>Hemiptera</b>                                             |              |              |              |                  |  |
| <i>Anthocoris nemoralis</i> (Fabricius, 1794)                |              | 1            |              |                  |  |
| <i>Aphanus rolandri</i> (Linnaeus, 1758)                     |              | 1            |              |                  |  |
| <i>Brachysteles parvicornis</i> (A. Costa, 1847)             |              | 2            |              |                  |  |
| <b><i>Campyloneura virgula</i> (Herrich-Schaeffer, 1835)</b> | <b>1</b>     | <b>13</b>    | <b>219</b>   | <b>0.01</b>      |  |
| <b><i>Cinara juniperi</i> (De Geer, 1773)</b>                | <b>28.06</b> | <b>24.5</b>  | <b>41.5</b>  | <b>&lt;0.001</b> |  |
| <i>Cyphopterum adscendens</i> (Herrich-Schäffer 1835)        | 52.3         | 68.22        | 123.5        | 0.39             |  |
| <i>Emblethis denticollis</i> Horváth, 1878                   |              | 1            |              |                  |  |
| <i>Eremocoris maderensis</i> (Wollaston, 1858)               |              | 1            |              |                  |  |
| <i>Eupteryx filicum</i> (Newman, 1853)                       |              | 4.88         |              |                  |  |
| <i>Euscelidius variegatus</i> (Kirschbaum, 1858)             |              | 1            |              |                  |  |
| <i>Geotomus punctulatus</i> (A. Costa, 1847)                 | 1            |              |              |                  |  |
| <i>Heterotoma planicornis</i> (Pallas, 1772)                 | 1            |              |              |                  |  |
| <i>Kelisia ribauti</i> Wagner, 1938                          | 3.67         | 1.57         | 172          | 0.37             |  |
| <i>Kleidocerys ericae</i> (Horváth, 1909)                    | 112.43       | 17.17        | 135          | 0.54             |  |
| <b><i>Loricula elegantula</i> (Bärensprung, 1858)</b>        | <b>7</b>     | <b>6.75</b>  | <b>218</b>   | <b>0.01</b>      |  |
| <i>Megamelodes quadrimaculatus</i> (Signoret, 1865)          | 2            |              |              |                  |  |
| <i>Monalocoris filicis</i> (Linnaeus, 1758)                  | 6            | 9.44         | 184          | 0.19             |  |
| <b><i>Nabis pseudoferus ibericus</i> Remane 1962</b>         | <b>2.17</b>  | <b>1</b>     | <b>103</b>   | <b>0.03</b>      |  |
| <i>Orius laevigatus laevigatus</i> (Fieber, 1860)            | 1            | 1.25         | 170.5        | 0.27             |  |
| <i>Piezodorus lituratus</i> (Fabricius, 1794)                |              | 2.33         |              |                  |  |
| <i>Pilophorus confusus</i> (Kirschbaum, 1856)                | 6            | 2.17         | 182          | 0.13             |  |
| <i>Pilophorus perplexus</i> Douglas & Scott, 1875            | 3            | 1            | 147          | 0.84             |  |
| <i>Plinthisus brevipennis</i> (Latreille, 1807)              | 62           |              |              |                  |  |
| <i>Plinthisus minutissimus</i> Fieber, 1865                  | 1            |              |              |                  |  |
| <i>Saldula palustris</i> (Douglas, 1874)                     |              | 1            |              |                  |  |
| <i>Scolopostethus decoratus</i> (Hahn, 1833)                 | 2            | 3            | 148          | 0.90             |  |
| <b><i>Trioza laurisilvae</i> Hodkinson, 1990</b>             | <b>8.71</b>  | <b>5.63</b>  | <b>82.5</b>  | <b>0.02</b>      |  |
| <b>Psocoptera</b>                                            |              |              |              |                  |  |
| <i>Atlantopsocus adustus</i> (Hagen, 1865)                   | 6.80         | 4.77         | 198.5        | 0.06             |  |
| <i>Bertkauia lucifuga</i> (Rambur, 1842)                     | 7            | 2.86         | 162          | 0.54             |  |
| <i>Ectopsocus strauchi</i> Enderlein, 1906                   | 2            | 3.67         | 169.5        | 0.31             |  |
| <b><i>Trichopsocus clarus</i> (Banks, 1908)</b>              | <b>6.45</b>  | <b>30.25</b> | <b>250</b>   | <b>&lt;0.001</b> |  |
| <b><i>Valenzuela burmeisteri</i> (Brauer, 1876)</b>          | <b>2.33</b>  | <b>12.85</b> | <b>201.5</b> | <b>0.04</b>      |  |
| <i>Valenzuela flavidus</i> (Stephens, 1836)                  | 7.79         | 32.90        | 205          | 0.053            |  |

Table S4

Abundance differences (mean number) of introduced species from four taxonomic groups in Azorean native and exotic forests. The differences between habitats were assessed using Wilcoxon test. Wilcoxon test estimates (W) and p-values are indicated with significant differences in bold.

|                                                    | Native forest | Exotic forest | W          | P-value     |
|----------------------------------------------------|---------------|---------------|------------|-------------|
| <b>Araneae</b>                                     |               |               |            |             |
| <i>Agyneta decora</i> (O. Pickard-Cambridge, 1871) | 1             |               |            |             |
| <i>Agyneta fuscipalpa</i> (C. L. Koch, 1836)       |               | 2.75          |            |             |
| <i>Araneus angulatus</i> Clerck, 1757              |               | 1             |            |             |
| <i>Cheiracanthium erraticum</i> (Walckenaer, 1802) | 1             | 1             | 122        | 0.31        |
| <i>Cheiracanthium mildei</i> L. Koch, 1864         | 4.5           | 4.75          | 142        | 0.79        |
| <i>Clubiona terrestris</i> Westring, 1851          |               | 3             |            |             |
| <i>Cryptachaea blattea</i> (Urquhart, 1886)        |               | 20.4          |            |             |
| <i>Dysdera crocata</i> C. L. Koch, 1838            | 3.11          | 5.67          | 141.5      | 0.87        |
| <i>Erigone atra</i> Blackwall, 1833                | 1             |               |            |             |
| <i>Erigone autumnalis</i> Emerton, 1882            |               | 3             |            |             |
| <i>Erigone dentipalpis</i> (Wider, 1834)           |               | 2             |            |             |
| <b><i>Ero furcata</i> (Villers, 1789)</b>          | <b>4</b>      | <b>2.25</b>   | <b>73</b>  | <b>0.01</b> |
| <i>Mangora acalypha</i> (Walckenaer, 1802)         | 1             |               |            |             |
| <i>Marinarozelotes lyonneti</i> (Audouin, 1826)    |               | 1             |            |             |
| <i>Metellina merianae</i> (Scopoli, 1763)          |               | 4             |            |             |
| <i>Neriere clathrata</i> (Sundevall, 1830)         |               | 1             |            |             |
| <i>Nigma puella</i> (Simon, 1870)                  |               | 1.5           |            |             |
| <i>Oecobius navus</i> Blackwall, 1859              |               | 6.5           |            |             |
| <i>Oedothorax fuscus</i> (Blackwall, 1834)         | 2             | 1.33          | 134        | 0.91        |
| <i>Pelecopsis parallela</i> (Wider, 1834)          |               | 1             |            |             |
| <i>Porrhoclubiona genevensis</i> (L. Koch, 1866)   | 3             | 6.57          | 156.5      | 0.35        |
| <i>Prinerigone vagans</i> (Audouin, 1826)          |               | 1             |            |             |
| <i>Salticus mutabilis</i> Lucas, 1846              |               | 3             |            |             |
| <i>Segestria florentina</i> (Rossi, 1790)          |               | 3.33          |            |             |
| <i>Steatoda grossa</i> (C. L. Koch, 1838)          |               | 1             |            |             |
| <i>Steatoda nobilis</i> (Thorell, 1875)            |               | 1.83          |            |             |
| <i>Tegenaria pagana</i> C. L. Koch, 1842           |               | 59            |            |             |
| <i>Tenuiphantes tenuis</i> (Blackwall, 1852)       | 5.3           | 18.65         | 172        | 0.21        |
| <i>Textrix caudata</i> L. Koch, 1872               |               | 1.75          |            |             |
| <i>Zygiella x-notata</i> (Clerck, 1757)            |               | 2             |            |             |
| <b>Coleoptera</b>                                  |               |               |            |             |
| <i>Aleochara bipustulata</i> (Linnaeus, 1760)      | 1.29          | 1.6           | 121.5      | 0.87        |
| <i>Amischa analis</i> (Gravenhorst, 1802)          | 1             | 1             | 121.5      | 0.72        |
| <i>Anisodactylus binotatus</i> (Fabricius, 1787)   | 1             |               |            |             |
| <b><i>Anobium punctatum</i> (De Geer, 1774)</b>    | <b>1</b>      | <b>9.75</b>   | <b>167</b> | <b>0.05</b> |
| <i>Atheta aeneicollis</i> (Sharp, 1869)            | 2             | 1.43          | 125.5      | 1.00        |
| <i>Atheta fungi</i> (Gravenhorst, 1806)            | 1.5           | 59.17         | 146        | 0.33        |
| <i>Brassicogethes aeneus</i> (Fabricius, 1775)     |               | 1             |            |             |
| <i>Calymmaderus solidus</i> (Kiesenwetter, 1877)   |               | 1             |            |             |
| <i>Carcinops pumilio</i> (Erichson, 1834)          |               | 1             |            |             |
| <i>Carpophilus fumatus</i> Boheman, 1851           |               | 1             |            |             |

|                                                         |             |              |              |                 |
|---------------------------------------------------------|-------------|--------------|--------------|-----------------|
| <i>Cartodere bifasciata</i> (Reitter, 1877)             |             | 7            |              |                 |
| <i>Cartodere nodifer</i> (Westwood, 1839)               |             | 2.67         |              |                 |
| <i>Cercyon haemorrhoidalis</i> (Fabricius, 1775)        |             | 1.67         |              |                 |
| <i>Chaetocnema hortensis</i> (Fourcroy, 1785)           |             | 1.33         |              |                 |
| <i>Clitostethus arcuatus</i> (Rossi, 1794)              |             | 1            |              |                 |
| <i>Coccotrypes carpophagus</i> (Hornung, 1842)          |             | 1.4          |              |                 |
| <i>Coelositona puberulus</i> (Reitter, 1903)            | 2           | 1            | 121          | 0.68            |
| <i>Coproporus pulchellus</i> (Erichson, 1839)           | 1           | 2.5          | 128.5        | 0.88            |
| <i>Cordalia obscura</i> (Gravenhorst, 1802)             | 1           | 1            | 121.5        | 0.72            |
| <i>Cryptophagus cellaris</i> (Scopoli, 1763)            |             | 1            |              |                 |
| <i>Dromius meridionalis</i> Dejean, 1825                | 5           | 1.57         | 154          | 0.17            |
| <i>Epitrix cucumeris</i> (Harris, 1851)                 | 1           | 1.5          | 140.5        | 0.40            |
| <i>Epitrix hirtipennis</i> (Melsheimer, 1847)           |             | 1.33         |              |                 |
| <i>Gonipterus platensis</i> (Marelli, 1926)             |             | 11.75        |              |                 |
| <i>Gyrophypnus fracticornis</i> (Müller, 1776)          | 1           | 1            | 121.5        | 0.72            |
| <i>Heteroderes vagus</i> Candèze, 1893                  |             | 1            |              |                 |
| <i>Litargus balteatus</i> LeConte, 1856                 |             | 3            |              |                 |
| <i>Longitarsus kutscherai</i> (Rye, 1872)               |             | 1            |              |                 |
| <i>Mecinus pascuorum</i> (Gyllenhal, 1813)              | 1           | 3.2          | 148          | 0.23            |
| <i>Naupactus cervinus</i> (Boheman, 1840)               |             | 12.5         |              |                 |
| <i>Otiorhynchus cribricollis</i> Gyllenhal, 1834        |             | 4.75         |              |                 |
| <i>Otiorhynchus rugosostriatus</i> (Goeze, 1777)        |             | 1            |              |                 |
| <i>Phenolia limbata tibialis</i> (Boheman, 1851)        |             | 1            |              |                 |
| <i>Popillia japonica</i> Newman, 1838                   | 1           | 1.25         | 140          | 0.42            |
| <i>Ptenidium pusillum</i> (Gyllenhal, 1808)             | 1           | 1.5          | 128          | 0.91            |
| <i>Rhyzobius lophanthae</i> (Blaisdell, 1892)           |             | 1            |              |                 |
| <i>Rodolia cardinalis</i> (Mulsant, 1850)               | 1           | 1.5          | 128          | 0.91            |
| <b><i>Sericoderus lateral</i></b> (Gyllenhal, 1827)     | <b>11</b>   | <b>6.92</b>  | <b>183.5</b> | <b>0.02</b>     |
| <i>Sitona discoideus</i> Gyllenhal, 1834                |             | 1.43         |              |                 |
| <i>Sphenophorus abbreviatus</i> (Fabricius, 1787)       | 4           |              |              |                 |
| <i>Stelidota geminata</i> (Say, 1825)                   |             | 4.75         |              |                 |
| <b><i>Tachyporus chrysomelinus</i></b> (Linnaeus, 1758) | <b>1</b>    | <b>2.33</b>  | <b>172.5</b> | <b>0.03</b>     |
| <i>Tachyporus nitidulus</i> (Fabricius, 1781)           | 4.38        | 3.82         | 120          | 0.83            |
| <i>Trichiusa immigrata</i> Lohse, 1984                  |             | 1            |              |                 |
| <i>Typhaea stercorea</i> (Linnaeus, 1758)               |             | 1            |              |                 |
| <i>Xantholinus longiventris</i> Heer, 1839              | 1           |              |              |                 |
| <i>Xyleborinus alni</i> Nijima, 1909                    |             | 2            |              |                 |
| <b>Hemiptera</b>                                        |             |              |              |                 |
| <i>Acizzia uncatoides</i> (Ferris & Klyver, 1932)       | 1           | 19.13        | 50           | 0.23            |
| <i>Buchananiella continua</i> (White, 1880)             |             | 1            |              |                 |
| <i>Empicoris rubromaculatus</i> (Blackburn, 1889)       |             | 1            |              |                 |
| <i>Siphanta acuta</i> (Walker, 1851)                    |             | 15.11        |              |                 |
| <i>Sophonia orientalis</i> (Matsumura, 1912)            |             | 4            |              |                 |
| <i>Taylorilygus apicalis</i> (Fieber, 1861)             |             | 1            |              |                 |
| <b>Psocoptera</b>                                       |             |              |              |                 |
| <b><i>Ectopsocus brigg</i></b> si McLachlan, 1899       | <b>3.82</b> | <b>14.79</b> | <b>170.5</b> | <b>&lt;0.01</b> |
